# Supplementary material for: Silencing PRSS1 suppresses the growth and proliferation of gastric carcinoma cells via the ERK pathway
Source: PubMed Central journal article supplement (PMC8040304; doi:10.7150/ijbs.52591), 2021-03-01
Supplement: ijbsv17p0957s1.pdf [file ijbsv17p0957s1.pdf]

**Supplementary table 1.** LCM purified poorly differentiated gastric adenocarcinoma

| <b>Cases<br/>(n=20)</b> | <b>Sex</b> | <b>Ages</b> | <b>Site of gastric<br/>cancer</b> | <b>Stage</b> | <b>Lymph node<br/>metastasis</b> |
|-------------------------|------------|-------------|-----------------------------------|--------------|----------------------------------|
| 1                       | male       | 41          | gastric body                      | II           | Yes                              |
| 2                       | female     | 63          | gastric antrum                    | IV           | Yes                              |
| 3                       | female     | 57          | gastric fundus                    | IV           | Yes                              |
| 4                       | male       | 48          | gastric antrum                    | II           | Yes                              |
| 5                       | male       | 58          | gastric body                      | II           | Yes                              |
| 6                       | male       | 60          | gastric body                      | II           | Yes                              |
| 7                       | male       | 77          | gastric fundus                    | II           | Yes                              |
| 8                       | female     | 47          | gastric body                      | III          | Yes                              |
| 9                       | male       | 69          | gastric body                      | II           | Yes                              |
| 10                      | female     | 49          | gastric antrum                    | II           | Yes                              |
| 11                      | female     | 67          | gastric body                      | II           | Yes                              |
| 12                      | male       | 53          | gastric fundus                    | II           | Yes                              |
| 13                      | male       | 54          | gastric fundus                    | IV           | Yes                              |
| 14                      | male       | 70          | gastric antrum                    | II           | Yes                              |
| 15                      | male       | 61          | gastric antrum                    | II           | Yes                              |
| 16                      | male       | 50          | gastric body                      | II           | Yes                              |
| 17                      | female     | 61          | gastric fundus                    | III          | Yes                              |
| 18                      | male       | 71          | gastric body                      | II           | Yes                              |
| 19                      | female     | 56          | gastric body                      | II           | Yes                              |
| 20                      | female     | 38          | gastric body                      | III          | Yes                              |
